# Supplementary material for: Segmental analysis by speckle-tracking echocardiography of the left ventricle response to isoproterenol in male and female mice
Source: PeerJ. 2021 Mar 12;9:e11085. doi: 10.7717/peerj.11085 (PMC7958899; doi:10.7717/peerj.11085)
Supplement: Supplemental Information 2 — Complete echo data obtained for the study. [file peerj-09-11085-s007.xlsx]

## Sheet: PompeIsoproterenol-Semaine0_DAT
id	group	Time	td_a	td_e	td_ivrt	td_s_wave	pw_mv_a	pw_mv_decel	pw_mv_time	pw_mv_e	pw_ivrt	pw_ea	td_ea	td_pw_ee	sax_m_lvpw_s	sax_m_lvpw_d	sax_m_lvid_s	sax_m_lvid_d	sax_m_ivs_s	sax_m_ivs_d	sax_m_rwt	sax_m_lv_vol_s	sax_m_lv_vol_d	sax_m_lv_mass_corrected	sax_m_lv_mass	sax_m_fs	sax_m_sv	sax_m_ef	pslax_m_lvpw_s	pslax_m_lvpw_d	pslax_m_lvid_s	pslax_m_lvid_d	pslax_m_ivs_s	pslax_m_ivs_d	pslax_m_rwt	pslax_m_lv_vol_s	pslax_m_lv_vol_d	pslax_m_lv_mass_corrected	pslax_m_lv_mass	pslax_m_fs	pslax_m_sv	pslax_m_ef	pslax_4d_volume_s	pslax_4d_volume_d	pslax_4d_stroke_volume	pslax_4d_ejection_fraction	pslax_4d_dvdt	pslax_4d_cardiac_output	pslax_4d_time
EW286	SHAM M	0	-16.0864	-27.0722	16.25	20.0099	403.781	-38044.2	17.5	660.554	15.625	1.63592	1.68293	-24.3997	1.44247	0.845588	1.96475	3.45696	1.21035	0.787557	0.472422	12.1635	49.3753	76.2943	95.3679	43.1655	37.2117	75.3651	1.18333	0.813542	2.68099	3.80885	1.0724	0.758073	0.412621	26.5482	62.2973	84.6655	105.832	29.6116	35.7491	57.3847	13.5684	32.056	18.4876	57.6728	164.27	9.85389	112.544
EW287			-18.048	-28.249	18.75	21.1868	295.975	-28522.5	18.3333	521.387	16.25	1.76159	1.56522	-18.4568	1.27509	0.902046	2.04932	3.50719	1.39494	0.943674	0.526267	13.5404	51.1205	92.8667	116.083	41.5681	37.5801	73.5127	1.11897	0.826287	2.62323	3.77813	1.23661	0.878058	0.451108	25.1549	61.1043	93.3882	116.735	30.5681	35.9494	58.8328	17.787	35.0197	17.2327	49.2086	123.058	7.3756	140.037
EW288			-17.8912	-23.3841	17.75	17.7343	472.384	-34398.4	20	682.115	15.6667	1.44398	1.30702	-29.17	1.11401	0.808686	2.41781	3.6721	1.01498	0.759175	0.426966	20.5359	57.0823	79.4877	99.3596	34.1573	36.5464	64.0241	1.07275	0.767427	2.75613	3.90315	0.915961	0.742671	0.386892	28.4233	66.0367	83.5348	104.418	29.3869	37.6134	56.9583	18.6455	31.4176	12.7721	40.6527	85.4049	5.12161	149.547
EW289			-14.6478	-25.1105	15.8333	15.9556	376.83	-32436	17.5	567.939	14.1667	1.50715	1.71429	-22.6176	1.16611	0.803079	2.33223	3.63036	1.11111	0.847083	0.454546	18.7649	55.5396	83.7304	104.663	35.7576	36.7747	66.2135	1.10561	0.841583	2.90428	3.97689	1.0066	0.759075	0.40249	32.3287	69.043	93.1821	116.478	26.9709	36.7143	53.1759	18.2871	41.265	22.9779	55.6838	190.239	11.42	120.784
EW290			-17.4204	-29.1909	15	19.4606	403.781	-28071.4	23.3333	648.794	16.6667	1.6068	1.67568	-22.2259	1.20118	0.786225	2.19488	3.58169	1.12474	0.797145	0.442073	16.1085	53.7698	77.3702	96.7128	38.7195	37.6613	70.0417	0.971861	0.775305	2.85006	3.83285	1.01554	0.764385	0.401709	30.8672	63.2377	83.2008	104.001	25.641	32.3704	51.1885	15.0015	27.9568	12.9553	46.3404	90.7875	5.44123	142.699
EW291			-17.852	-27.8569	15	17.6558	381.73	-39330.3	16.0417	626.743	14.7222	1.64185	1.56044	-22.4986	1.0975	0.790196	2.54619	3.74246	1.21822	0.845071	0.43695	23.3614	59.7347	86.857	108.571	31.9648	36.3733	60.8914	1.08652	0.856046	2.61204	3.73148	1.21822	0.877996	0.464706	24.8898	59.3167	93.7666	117.208	30	34.4268	58.0391	17.4218	44.7794	27.3576	61.0942	224.875	13.4873	121.657
EW292			-15.3017	-24.3258	15.625	21.187	440.533	-31637.3	22.0833	695.346	15.4167	1.57842	1.58974	-28.5848	1.20436	0.821154	2.03646	3.44885	1.24815	0.843051	0.48254	13.3257	49.0964	78.048	97.56	40.9524	35.7707	72.8581	1.25637	0.821154	2.08573	3.54739	1.23173	0.812943	0.460648	14.1592	52.5409	79.5825	99.4781	41.2037	38.3816	73.051	14.967	36.0959	21.129	58.5356	170.459	10.2264	123.953
EW293			-16.0863	-24.3256	16.875	20.0097	325.376	-30061.6	15.4167	462.582	16.6667	1.42169	1.5122	-19.0163	1.28589	0.831395	2.1062	3.4586	1.15287	0.809225	0.474359	14.514	49.4318	76.8428	96.0535	39.1026	34.9178	70.6383	1.3136	0.831395	2.54407	3.77454	1.09744	0.781512	0.427313	23.3131	60.9655	86.4233	108.029	32.5991	37.6524	61.7601	14.9074	34.8334	19.926	57.2037	142.251	8.52833	140.076
EW286	SHAM M	3	-18.8327	-27.9875	15.8333	20.4167	397.247	-39299.9	16.9444	661.86	16.9444	1.66612	1.48611	-23.6484	1.42506	0.843889	1.97438	3.47905	1.30564	0.859811	0.489703	12.3161	50.1387	81.8001	102.25	43.2494	37.8226	75.4359	1.26258	0.853413	2.52517	3.76437	1.18075	0.841722	0.45031	22.8848	60.574	92.1452	115.181	32.9193	37.6892	62.2201	16.296	39.6855	23.3895	58.9371	200.347	12.0222	116.745
EW287			-18.0481	-27.7261	13.3333	24.5833	397.247	-29963.4	21.1111	629.192	13.8889	1.58388	1.53623	-22.6931	1.28152	0.818783	2.18796	3.50073	1.20338	0.859555	0.479425	15.9807	50.8943	80.8831	101.104	37.5	34.9136	68.6002	1.23295	0.866399	2.44091	3.67387	1.1913	0.883061	0.47619	21.0294	57.1482	92.6018	115.752	33.5601	36.1188	63.2019	16.436	35.4886	19.0526	53.6866	169.131	10.155	112.65
EW288			-20.1407	-32.6959	14.5833	24.1667	509.626	-47645.8	15.5	735.038	18.3333	1.44231	1.62338	-22.481	1.28981	0.817721	2.38572	3.7514	1.18865	0.834581	0.440449	19.8614	60.0764	88.4475	110.559	36.4045	40.215	66.9398	1.28812	0.865492	2.46159	3.75421	1.22068	0.826151	0.450599	21.4767	60.1841	91.4823	114.353	34.4311	38.7073	64.3149	16.4489	36.4317	19.9828	54.85	168.432	10.1113	118.64
EW289			-19.6176	-28.2493	16.25	22.5	348.245	-26295.8	20.8333	544.255	15.2083	1.56285	1.44	-19.2662	1.21559	0.831718	2.27123	3.59878	1.23158	0.895697	0.48	17.557	54.3878	88.0197	110.025	36.8889	36.8308	67.7188	1.20174	0.853649	2.33718	3.74611	1.31777	0.861937	0.457965	18.8648	59.8742	92.9611	116.201	37.6106	41.0094	68.4926	16.9603	38.8798	21.9195	56.3775	184.41	11.0693	118.863
EW290			-20.4023	-30.6034	15	21.25	505.053	-37625.8	19.1667	720.664	17.5	1.42691	1.5	-23.5485	1.33023	0.789826	2.15331	3.66645	1.20552	0.789826	0.430839	15.3494	56.8724	80.1069	100.134	41.2698	41.523	73.0108	1.33023	0.809225	2.31682	3.74682	1.18612	0.79814	0.428994	18.4555	59.9013	84.9895	106.237	38.1657	41.4458	69.1901	16.1219	35.6137	19.4917	54.7311	163.44	9.80434	119.259
EW291			-20.5984	-30.6034	14.0625	28.75	472.385	-42113.5	17.5	733.732	15.4167	1.55325	1.48571	-23.9755	1.07308	0.778508	2.57749	3.66109	1.05204	0.757467	0.41954	24.0813	56.6733	76.9098	96.1372	29.5977	32.592	57.5086	1.16061	0.841024	2.7081	3.78461	1.12697	0.790563	0.431111	27.2165	61.3548	88.18	110.225	28.4444	34.1384	55.6409	19.5025	38.4858	18.9833	49.3255	178.033	10.6876	106.628
EW292			-17.0673	-19.8137	16.5625	25	439.716	-25852.8	25.5556	655.327	18.3333	1.49034	1.16092	-33.0744	0.988934	0.761965	2.99923	3.93142	0.95651	0.737647	0.381443	34.9779	67.1806	83.7597	104.7	23.7113	32.2027	47.9346	1.02676	0.770071	2.88574	3.84225	1.05919	0.802495	0.409283	31.8247	63.6083	85.9593	107.449	24.8945	31.7836	49.9677	16.9801	36.3675	19.3874	53.3097	144.047	8.64678	134.591
EW293			-19.6174	-23.1485	16.875	27.5	369.476	-27035.5	23.3333	614.487	13.3333	1.66313	1.18	-26.5454	0.983163	0.805871	2.98172	3.91654	0.886458	0.725284	0.390946	34.4809	66.5771	85.5846	106.981	23.8683	32.0962	48.2091	1.1712	0.848851	2.82592	3.91116	0.956301	0.762892	0.412088	30.2284	66.36	91.512	114.39	27.7473	36.1315	54.4478	19.7127	36.5079	16.7952	46.0042	124.167	7.45706	135.263
EW248	ISO M	0	-15.6186	-25.3368	13.125	17.9324	450.438	-35461.7	17.7778	627.685	13.3333	1.3935	1.62222	-24.7736	1.15336	0.789798	2.11866	3.47678	1.19932	0.827407	0.465144	14.7324	50.06	75.9466	94.9332	39.0625	35.3276	70.5705	1.03774	0.738259	2.5073	3.73308	1.19097	0.738259	0.395522	22.4839	59.3776	75.2806	94.1007	32.8358	36.8936	62.134	15.1551	42.62	27.4649	64.4413	219.365	13.1557	125.202
EW249			-21.7503	-32.0855	14.5833	24.2184	512.087	-34114	23.1944	744.241	14.1667	1.45335	1.47518	-23.1956	1.06299	0.729348	2.31219	3.70881	1.17161	0.806938	0.414226	18.3631	58.4583	78.5811	98.2264	37.6569	40.0952	68.5877	1.07075	0.775902	2.56824	3.79416	1.07075	0.79142	0.413088	23.8672	61.7253	83.818	104.773	32.3108	37.8581	61.3332	22.7164	48.08	25.3636	52.7529	183.813	11.0332	137.986
EW250			-16.4284	-22.4445	15	20.1306	537.134	-39696.1	20.2778	797.225	14.7222	1.48422	1.3662	-35.5199	1.14474	0.754286	2.29835	3.62057	1.13143	0.838589	0.439951	18.0885	55.1814	79.3889	99.2361	36.5196	37.0928	67.2199	1.0353	0.776471	2.60303	3.8232	1.10185	0.746891	0.398452	24.6775	62.8585	81.6724	102.09	31.9149	38.181	60.7412	19.7956	45.8291	26.0336	56.8057	199.778	11.9754	130.312
EW251			-18.6652	-26.5323	13.75	22.6759	481.263	-42669	16.1111	685.483	15	1.42434	1.42149	-25.8358	1.19597	0.777383	2.29228	3.81715	1.23584	0.797315	0.412533	17.9688	62.6216	85.1949	106.494	39.9478	44.6528	71.3058	1.11624	0.781369	2.5235	3.78725	1.14813	0.801302	0.417895	22.8473	61.4571	84.6829	105.854	33.3684	38.6097	62.8239	17.6078	39.003	21.3952	54.8553	179.431	10.7618	119.239
EW252			-14.3458	-24.064	17.9167	20.8246	411.906	-36445.2	17.7778	646.951	15.8333	1.57063	1.67742	-26.8846	1.02361	0.72297	2.78451	3.9656	0.994978	0.744444	0.370036	29.1498	68.578	82.5608	103.201	29.7834	39.4282	57.4939	1.17035	0.730128	2.09375	3.6399	1.25625	0.8375	0.430679	14.2976	55.8904	78.339	97.9238	42.4779	41.5928	74.4185	18.7723	49.6234	30.8511	62.1704	202.125	12.1245	152.634
EW253			-18.5109	-29.3861	15	22.6759	496.676	-32642.4	21.1111	683.556	15.5556	1.37626	1.5875	-23.2612	1.03864	0.729317	2.5535	3.68114	1.01948	0.683941	0.383919	23.5285	57.4195	69.3564	86.6955	30.6328	33.891	59.0235	1.06152	0.786655	2.57872	3.76264	1.03241	0.685965	0.391379	24.1098	60.5075	75.9999	94.9999	31.4651	36.3977	60.154	20.5724	43.6413	23.0689	52.8602	168.735	10.1273	136.717
EW254			-18.0481	-29.309	14.1667	21.9046	415.891	-29682.7	22.0833	648.227	13.75	1.55865	1.62393	-22.117	1.31918	0.906935	2.54492	3.91356	1.15978	0.923425	0.467697	23.3324	66.457	109.147	136.434	34.9719	43.1246	64.891	1.26788	0.879452	2.59438	3.96486	1.26055	0.901439	0.449168	24.4748	68.5478	107.288	134.11	34.5656	44.0731	64.2953	19.0507	44.06	25.0092	56.7618	228.729	13.7301	109.34
EW255			-19.8992	-32.0856	13.75	22.9844	524.829	-29376.3	24.1667	711.855	12.0833	1.35636	1.6124	-22.1861	1.25203	0.841365	2.31376	3.696	1.21197	0.861398	0.460705	18.3943	57.976	90.0246	112.531	37.3984	39.5817	68.2726	1.2294	0.850802	2.35414	3.65524	1.19011	0.825489	0.458599	19.2098	56.4567	86.5257	108.157	35.5956	37.247	65.9744	14.6272	38.9844	24.3572	62.4793	201.086	12.0568	121.128
EW256			-15.5028	-24.7582	14.375	17.8166	478.553	-33401.7	21.01	704.14	15.4167	1.47139	1.59701	-28.4407	1.27966	0.949078	2.19674	3.67901	1.43961	0.863768	0.492754	16.143	57.3401	97.5847	121.981	40.2898	41.197	71.8468	1.30951	0.929883	2.42281	3.75366	1.19861	0.784856	0.456818	20.6423	60.1629	93.1986	116.498	35.4546	39.5206	65.6893	13.2191	40.7462	27.5271	67.5575	218.51	13.1029	125.976
EW257			-19.5907	-29.4632	15.4167	20.0535	397.574	-31828.2	18.75	596.169	17.0833	1.49952	1.50394	-20.2343	1.25483	0.920237	2.55206	4.03164	1.27603	0.872737	0.444725	23.4954	71.3218	111.261	139.076	36.6993	47.8264	67.0571	1.2825	0.92625	2.565	4.09687	1.22313	0.855	0.434783	23.7925	74.0886	113.168	141.46	37.3913	50.2961	67.8864	18.2693	49.6191	31.3498	63.1809	268.122	16.0824	116.924
EW248	ISO M	3	-9.42983	-15.7343	13.8933	28.2267	356.889	-35482.2	16.3889	578.43	17.6717	1.62076	1.66856	-36.7624	1.06473	0.811604	2.61562	3.68838	1.14508	0.811604	0.440087	24.9744	57.6903	83.969	104.961	29.085	32.7159	56.7095	1.12712	0.838687	2.5915	3.63431	1.06056	0.820937	0.456654	24.4073	55.6848	84.5464	105.683	28.6935	31.2775	56.1688	16.6686	36.6566	19.988	54.5277	139.819	8.39494	142.956
EW249			-16.9264	-23.4857	16.5625	26.875	424.45	-35567.9	19.0202	673.923	20.4369	1.58776	1.38752	-28.695	1.40629	0.953736	2.08326	3.42472	1.28287	0.898881	0.540954	14.1167	48.2725	89.9751	112.469	39.17	34.1557	70.7561	1.33125	0.88433	2.38357	3.63241	1.0967	0.786071	0.45986	19.8166	55.615	85.2396	106.549	34.3805	35.7984	64.3682	19.3255	40.4604	21.1349	52.236	160.224	9.61638	131.908
EW250			-11.1991	-17.03	15	32.9768	376.785	-20511.3	24.7364	499.704	20.3109	1.32623	1.52066	-29.3425	1.33667	0.941296	2.69485	3.7503	1.16959	0.904902	0.492281	26.8888	60.0342	103.227	129.034	28.1429	33.1454	55.2108	1.08877	0.778892	2.77219	3.79954	1.08319	0.829143	0.423218	28.8331	61.9344	86.9993	108.749	27.0389	33.1013	53.4458	25.1898	46.5073	21.3176	45.837	152.003	9.12391	140.244
EW251			-12.6391	-16.7001	18.5417	26.2644	377.007	-20391.3	26.9444	543.466	22.4444	1.44153	1.32131	-32.5427	1.24663	0.91876	2.98327	4.05335	1.17457	0.940378	0.458666	34.5246	72.2365	118.013	147.516	26.4	37.7118	52.2061	1.15926	0.855258	3.15486	4.06146	1.10386	0.883631	0.428144	39.57	72.5796	107.955	134.944	22.322	33.0096	45.4806	25.6316	45.1528	19.5213	43.2337	147.225	8.84313	132.595
EW252			-13.1732	-17.778	15.6786	25.1703	393.869	-19636	28.1683	552.04	22.0992	1.40158	1.34955	-31.052	1.24403	0.820532	2.78915	3.83467	0.969419	0.787446	0.419327	29.2696	63.3093	88.3143	110.393	27.2649	34.0397	53.7673	0.974487	0.751511	3.13818	4.0466	1.04881	0.788673	0.380612	39.0628	71.9511	91.074	113.842	22.449	32.8883	45.7092	30.3263	54.0553	23.7289	43.8975	159.469	9.56276	148.799
EW253			-14.9093	-17.852	14.5625	26.4375	395.337	-20568.4	28.572	577.979	20.9039	1.46199	1.19737	-32.3762	1.14123	0.8513	2.65877	3.67663	0.999352	0.737176	0.432047	26.0073	57.2512	81.0865	101.358	27.6846	31.2439	54.5733	1.00423	0.754619	2.84321	3.76966	0.989178	0.72362	0.392142	30.6851	60.7775	76.6257	95.7822	24.5764	30.0924	49.5124	24.2255	46.3344	22.1089	47.716	152.911	9.1752	144.586
EW254			-20.0533	-24.681	17.0833	30.3883	380.302	-22531.1	23.5417	522.897	21.5411	1.37495	1.23077	-21.1862	1.23123	0.976489	3.09222	4.03333	1.05433	0.834969	0.449123	37.6843	71.3925	112.927	141.158	23.3333	33.7082	47.2154	1.05079	0.8332	3.42302	4.15008	1.0561	0.838507	0.402813	48.2145	76.3872	106.009	132.511	17.5192	28.1727	36.8814	40.2097	66.5091	26.2994	39.5426	180.026	10.8091	146.087
EW255			-12.1629	-14.1246	16.875	30	315.575	-19306.3	23.5417	449.954	24.6023	1.42582	1.16129	-31.856	1.15001	0.794627	2.77521	3.79744	1.16599	0.890462	0.443743	28.9105	61.8527	92.6921	115.865	26.919	32.9421	53.259	1.23786	0.905103	2.8351	3.81341	1.15134	0.891793	0.471204	30.4705	62.4754	102.042	127.553	25.6545	32.0049	51.2281	30.0416	48.242	18.2005	37.7274	124.096	7.44399	146.664
EW256			-12.4848	-17.4697	15.3125	26.0425	388.402	-15707.8	35.2564	550.236	20.2564	1.41667	1.39927	-31.4966	1.11946	0.781208	2.85503	4.07114	1.10336	0.785235	0.384768	30.9996	72.9904	94.0959	117.62	29.8714	41.9908	57.5292	1.0931	0.778301	2.89923	3.93416	0.901672	0.763176	0.391819	32.1909	67.2923	87.0051	108.756	26.3063	35.1014	52.1626	20.9874	40.4664	19.4791	48.1364	132.765	7.96694	146.718
EW257			-15.694	-17.9174	14.25	23.85	393.522	-21924.6	25.4167	558.249	21.9444	1.4186	1.14167	-31.1569	1.17472	0.978935	3.13361	4.01567	1.24508	0.950382	0.480447	38.9246	70.653	122.449	153.062	21.9654	31.7283	44.9073	1.03074	0.905107	3.38344	4.20575	1.13638	0.875127	0.423286	46.8801	78.8326	118.018	147.522	19.5519	31.9525	40.5321	39.0311	65.0193	25.9882	39.97	183.294	10.993	141.785
EW294	SHAM F	0	-14.9093	-26.6799	17.5	15.694	403.781	-40528	14.5833	589.991	17.9167	1.46117	1.78947	-22.1137	1.16932	0.801446	2.25325	3.37002	1.05765	0.775169	0.467836	17.2095	46.4319	69.7226	87.1532	33.1384	29.2224	62.9361	1.16056	0.788308	2.23354	3.47074	1.02918	0.76641	0.447949	16.8332	49.8509	71.6972	89.6215	35.6467	33.0177	66.233	16.2361	33.4389	17.2028	51.4456	136.739	8.20574	125.807
EW295			-12.9476	-21.187	18.75	15.694	351.131	-25155.6	20.625	514.6	18.5417	1.46555	1.63636	-24.2885	1.28026	0.823818	1.95935	3.59585	1.38045	0.890614	0.47678	12.0785	54.2817	86.9783	108.723	45.5108	42.2032	77.7485	1.32479	0.801553	1.72557	3.35094	1.30252	0.857216	0.495017	8.71783	45.7992	74.2175	92.7718	48.505	37.0814	80.9651	13.6455	31.6332	17.9877	56.8633	122.92	7.37494	146.336
EW296			-19.7745	-25.4243	18	19.7745	351.509	-32419.6	18.0556	573.652	16.3889	1.63197	1.28571	-22.5631	1.01367	0.742685	2.3786	3.56288	1.16421	0.833012	0.442253	19.7134	53.0941	76.2005	95.2507	33.2394	33.3807	62.8708	1.17425	0.827994	2.07751	3.43241	1.24952	0.843048	0.486842	14.0182	48.5342	77.9067	97.3834	39.4737	34.516	71.1169	15.2945	31.5873	16.2928	51.5804	111.936	6.71265	145.554
EW297			-20.9254	-32.9575	21.25	24.0642	446.25	-41344.3	15.8333	658.594	16.9444	1.47584	1.575	-19.9831	1.19391	0.862266	2.52047	3.76412	1.16074	0.89543	0.46696	22.7791	60.5645	96.9017	121.127	33.0396	37.7854	62.3887	1.34315	0.862266	2.3049	3.81387	1.24365	0.89543	0.460869	18.2182	62.4933	98.9647	123.706	39.5652	44.2751	70.8477	15.9223	46.2812	30.359	65.5967	215.734	12.9329	140.724
EW298			-15.4325	-25.1105	22.5	19.6176	384.18	-37109.5	15.2778	567.123	16.9444	1.47619	1.62712	-22.5851	1.20641	0.763026	2.06223	3.42331	1.09298	0.763026	0.445783	13.7581	48.2243	68.3375	85.4219	39.759	34.4662	71.4706	1.18296	0.719367	2.20606	3.54888	1.08704	0.719367	0.405405	16.3162	52.594	66.867	83.5837	37.8378	36.2778	68.977	15.4323	39.3673	23.935	60.7993	185.855	11.1537	128.783
EW299			-15.694	-25.5028	16.25	15.694	423.382	-44827.5	14.5833	634.093	15.4167	1.49769	1.625	-24.8636	1.19731	0.844255	2.30251	3.5996	1.13591	0.798205	0.45629	18.1708	54.4173	82.0556	102.57	36.0341	36.2465	66.6084	1.27535	0.853095	2.17559	3.57046	1.12341	0.789405	0.460025	15.7536	53.3657	80.9925	101.241	39.067	37.6121	70.4799	18.7345	45.0481	26.3135	58.4122	175.331	10.5254	150.08
EW300			-16.4787	-24.3258	20	17.2635	380.913	-30641.1	20	586.724	16.9444	1.54031	1.47619	-24.1194	1.13297	0.734897	2.05159	3.35297	1.05641	0.780828	0.452055	13.5785	45.8663	65.4653	81.8317	38.8128	32.2878	70.3954	1.19421	0.796138	2.12814	3.58262	1.13297	0.888	0.470085	14.8997	53.8034	84.3325	105.416	40.5983	38.9036	72.3071	12.6316	28.0259	15.3943	54.9288	107.517	6.45022	143.18
EW301			-15.9556	-26.9414	24.1667	18.0482	341.711	-28307.4	18.3333	514.853	18.0556	1.50669	1.68852	-19.1101	1.28964	0.817999	1.93077	3.30884	1.23068	0.759044	0.476615	11.6339	44.42	67.7362	84.6703	41.6481	32.7861	73.8093	0.995062	0.729712	2.38815	3.7149	1.0614	0.729712	0.392857	19.912	58.688	73.5145	91.8931	35.7143	38.776	66.0715	14.3427	28.2709	13.9282	49.2669	106.434	6.37913	130.862
EW294	SHAM F	3	-18.2443	-26.2875	14.3333	22.4	374.378	-33578.7	17	550.786	16.9444	1.4712	1.44086	-20.9524	1.21586	0.763684	2.04989	3.30595	1.04504	0.773732	0.465046	13.55	44.3259	66.4695	83.0869	37.9939	30.7759	69.431	1.19979	0.807897	2.29708	3.47275	1.06112	0.753635	0.449653	18.0634	49.9204	72.2	90.2501	33.8542	31.857	63.8156	15.6467	33.9269	18.2802	53.8811	128.749	7.73251	141.984
EW295			-15.4325	-19.356	15.8333	24.5833	341.711	-23810.9	22.5	514.853	21.0417	1.50669	1.25424	-26.5992	1.20412	0.762609	2.28783	3.53209	1.01347	0.742541	0.426136	17.8812	51.9977	70.5498	88.1872	35.2273	34.1165	65.6116	1.26387	0.776804	2.27797	3.54113	1.06725	0.776804	0.438733	17.6882	52.3183	73.9934	92.4917	35.6711	34.6301	66.1912	16.6187	35.139	18.5203	52.7059	127.926	7.6674	144.773
EW296			-22.8685	-31.6123	15.625	20.9375	364.579	-28731.9	18.6111	537.721	12.3333	1.47491	1.38235	-17.0099	1.18492	0.75141	2.0158	3.46805	1.06209	0.76586	0.4375	12.9847	49.7576	69.2374	86.5467	41.875	36.7729	73.9041	1.09248	0.745157	2.35546	3.55529	1.11142	0.770417	0.426288	19.2367	52.8225	71.984	89.98	33.7478	33.5858	63.5824	10.8978	30.6219	19.7241	64.4118	171.121	10.2762	115.264
EW297			-24.4379	-30.155	14.25	19	342.528	-31900.5	20.2083	634.093	16.875	1.85122	1.23394	-21.0278	1.26764	0.81491	2.35418	3.90169	1.11124	0.790215	0.411392	19.2107	65.978	90.6406	113.301	39.6625	46.7673	70.8832	1.24459	0.823141	2.46284	3.95766	1.05362	0.763875	0.400998	21.5038	68.2522	91.3779	114.222	37.7704	46.7484	68.4936	18.6137	39.808	21.1943	53.2413	160.331	9.62221	132.191
EW298			-16.6749	-21.187	16.5625	22.5	327.827	-36664.3	16.0417	563.039	19.5833	1.71749	1.27059	-26.5748	1.12478	0.779315	2.46649	3.66358	1.09265	0.747178	0.416667	21.5835	56.7658	76.3488	95.436	32.6754	35.1824	61.9781	1.13855	0.765145	2.5103	3.70813	1.03335	0.758042	0.41077	22.5509	58.4325	77.6492	97.0615	32.3029	35.8816	61.4069	14.7858	37.8527	23.0669	60.9385	150.048	8.99608	153.73
EW299			-26.6799	-30.865	16.25	20.4167	348.898	-32393.1	18.5	599.791	16.25	1.7191	1.15686	-19.4328	1.16987	0.769232	2.0593	3.50161	1.1218	0.753207	0.434783	13.7085	50.925	70.659	88.3237	41.1899	37.2165	73.081	1.20994	0.81731	2.44392	3.59776	0.985579	0.793271	0.447662	21.0941	54.3509	79.7895	99.7369	32.0713	33.2568	61.1891	15.5702	38.1877	22.6175	59.2271	168.361	10.11	134.339
EW300			-18.0482	-24.7181	16.875	24.375	397.247	-35903.2	18.0556	635.726	18.3333	1.60033	1.36957	-25.719	1.14673	0.74755	2.09024	3.52002	0.958026	0.725777	0.418557	14.2369	51.5715	68.139	85.1737	40.6186	37.3346	72.3938	1.11157	0.772419	2.13745	3.49461	1.07138	0.762039	0.439093	15.0652	50.6804	71.196	88.995	38.8358	35.6151	70.274	13.2718	30.6127	17.3409	56.646	136.431	8.1849	127.104
EW301			-20.6638	-24.3258	17.9167	21.6667	408.681	-30945	19.5833	585.09	21.0417	1.43165	1.17722	-24.0523	1.0681	0.749152	2.04272	3.42935	1.03215	0.703681	0.423646	13.43	48.43	64.0559	80.0698	40.4342	35	72.2692	1.1519	0.753972	2.13625	3.47665	0.973881	0.733029	0.427711	15.0439	50.0554	67.6203	84.5253	38.5542	35.0115	69.9456	13.1315	31.5521	18.4205	58.3814	142.188	8.52871	129.551
EW268	ISO F	0	-18.1638	-27.9978	17.1875	17.354	465.851	-36367.4	19.1667	702.822	20	1.50868	1.5414	-25.1028	1.13289	0.727476	2.00435	3.33805	1.07227	0.788099	0.45403	12.7978	45.3746	64.9876	81.2345	39.9546	32.5768	71.7953	1.12721	0.79094	2.28757	3.43372	1.04669	0.771996	0.455172	17.8761	48.5789	70.9844	88.7305	33.3793	30.7028	63.2019	13.1107	35.5609	22.4501	63.1316	181.698	10.9108	123.557
EW269			-12.8033	-17.8937	16.25	14.9629	359.885	-30528.9	18.6111	569.882	23.0556	1.58351	1.39759	-31.8481	1.07712	0.78472	2.31205	3.53689	1.01943	0.671484	0.411719	18.3602	52.1679	67.5923	84.4903	34.6305	33.8077	64.8055	1.15253	0.703238	2.25622	3.6334	0.918117	0.625101	0.365591	17.2667	55.6513	62.4939	78.1174	37.9032	38.3845	68.9733	11.0926	29.4959	18.4033	62.3928	120.086	7.21411	153.252
EW270			-14.8087	-25.2211	17.5	16.4284	427.319	-26687.3	23.0556	614.198	18.0556	1.43733	1.70312	-24.3525	1.23429	0.756875	1.69423	3.12065	0.919894	0.675365	0.458955	8.31469	38.534	53.9016	67.377	45.7089	30.2193	78.4224	1.08864	0.728959	2.16769	3.4146	0.959156	0.64743	0.40309	15.6097	47.9288	59.1008	73.876	36.5169	32.3191	67.4315
EW271			-18.3567	-26.9951	18.3333	18.0481	382.044	-30769.5	18.3333	564.107	15.8333	1.47655	1.47059	-20.8967	1.20334	0.733745	1.74142	3.1013	1.12508	0.831578	0.504732	8.92608	37.9544	60.4828	75.6034	43.8486	29.0284	76.4821	1.05915	0.679451	1.95744	3.34216	1.21547	0.805818	0.444403	12.0485	45.5099	63.3206	79.1507	41.4319	33.4614	73.5255	11.0862	33.9721	22.886	67.3668	200.565	12.038	114.108
EW272			-15.7343	-23.1386	20.8333	16.0428	347.444	-23018.1	24.375	559.535	16.4583	1.61043	1.47059	-24.1818	1.15573	0.848424	2.20457	3.3937	1.22253	0.848424	0.5	16.2884	47.2239	78.199	97.7487	35.0394	30.9354	65.5081	0.987045	0.736526	2.65049	3.55236	0.92692	0.731515	0.413258	25.8074	52.7181	68.8309	86.0387	25.3879	26.9107	51.0465	12.0419	31.4058	19.3639	61.657	160.749	9.64322	120.46
EW273			-24.0642	-36.0963	20.4167	20.8248	478.855	-47387	14.1667	668.143	16.875	1.39529	1.5	-18.51	1.03968	0.734773	2.63419	3.92879	1.12465	0.799753	0.390585	25.4161	67.0738	86.2833	107.854	32.9516	41.6577	62.1073	0.956466	0.721616	2.84201	4.01219	1.11353	0.808481	0.381362	30.6532	70.5076	89.004	111.255	29.1657	39.8544	56.525	15.6956	36.366	20.6704	56.8399	173.829	10.4385	118.912
EW274			-12.6491	-18.8194	14.5278	17.4311	419.612	-24013.3	24.1667	578.557	18.3333	1.37879	1.4878	-30.7425	1.16541	0.953639	1.90664	3.07239	1.21821	0.807853	0.57333					37.9428			1.03459	0.753345	2.35044	3.58592	0.984371	0.683033	0.40056	19.1342	53.9225	67.8715	84.8394	34.4538	34.7883	64.5153	8.88629	27.5723	18.6861	67.771	124.925	7.49311	149.578
EW275			-18.5108	-25.9151	17.5	17.431	413.83	-40466.7	15	593.003	18.3333	1.43296	1.4	-22.8825	0.947684	0.719538	2.26391	3.352	1.14073	0.719538	0.429319	17.4151	45.8342	60.9168	76.146	32.4607	28.4191	62.0041	0.939518	0.696749	2.34758	3.47889	1.1046	0.793857	0.428472	19.076	50.1331	67.9161	84.8952	32.5192	31.057	61.9492	11.3741	33.8917	22.5176	66.4398	171.748	10.313	131.108
EW276			-24.527	-34.2452	17.5	21.5961	455.736	-30948	24.375	705.712	16.875	1.54851	1.39623	-20.6076	1.14024	0.792374	2.09689	3.3241	1.21755	0.773048	0.47093	14.352	44.9174	67.5318	84.4148	36.9186	30.5654	68.0479	1.06777	0.753721	2.62353	3.61883	0.932489	0.681248	0.396529	25.1621	55.1176	68.8127	86.0159	27.5033	29.9555	54.3483	13.6961	34.1498	20.4537	59.894	161.205	9.67459	126.88
EW277			-18.5109	-26.3781	15	21.0562	390.713	-36357.1	18.0556	656.584	16.9444	1.68047	1.425	-24.8913	1.15757	0.696964	2.09695	3.41815	1.13332	0.757569	0.425532	14.3531	48.0493	63.8165	79.7707	38.6525	33.6963	70.1284	1.14181	0.687267	1.95998	3.41815	1.14545	0.767266	0.425532	12.0885	48.0493	63.8165	79.7707	42.6596	35.9609	74.8416	12.9138	31.8882	18.9745	59.5031	159.545	9.58211	118.928
EW268	ISO F	3	-14.1245	-16.6748	14.375	29.375	337.248	-30577.8	20	608.896	24.5833	1.80548	1.18056	-36.5159	1.08072	0.785702	2.51364	3.49502	1.11985	0.803764	0.45478	22.6259	50.6946	74.7646	93.4557	28.0792	28.0687	55.3682	0.940417	0.713785	2.64545	3.54562	1.05479	0.743437	0.410992	25.686	52.4782	67.9311	84.9139	25.3883	26.7922	51.0539	21.7926	40.9533	19.1607	46.7866	128.568	7.72175	149.031
EW269			-16.4787	-20.6638	14.4583	21.4583	340.622	-37013.7	16.1111	594.932	18.6111	1.74661	1.25397	-28.791	1.03343	0.67098	2.48921	3.54062	0.958542	0.733884	0.396785	22.0824	52.3002	64.5029	80.6286	29.6955	30.2178	57.7776	1.06442	0.741516	2.44169	3.46267	1.03035	0.732004	0.425545	21.0462	49.5718	66.3451	82.9313	29.4852	28.5256	57.544	13.1764	31.7242	18.5478	58.4658	135.812	8.14248	136.57
EW270			-19.029	-24.3258	14.75	21.875	456.218	-27417.3	23.6111	648.877	18	1.4223	1.27835	-26.6745	1.16958	0.837998	2.23667	3.31582	1.08518	0.741538	0.476364	16.8927	44.647	68.1152	85.1439	32.5454	27.7543	62.1639	1.16657	0.791275	2.27887	3.31431	1.05805	0.764146	0.469304	17.7058	44.5979	66.6134	83.2667	31.2415	26.892	60.2989	12.0988	28.7881	16.6893	57.9729	136.874	8.21114	121.932
EW271			-15.855	-24.2539	14.4599	20.2276	439.842	-36715.6	17.5	627.685	18.5833	1.42707	1.52973	-25.8797	1.26904	0.91219	2.17095	3.34024	1.22174	0.879281	0.53633	15.669	45.4466	82.4483	103.06	35.0062	29.7776	65.5222	1.06007	0.755256	2.41139	3.40236	1.08846	0.770065	0.448313	20.4	47.5152	67.6178	84.5223	29.1259	27.1152	57.0664	19.9936	35.2709	15.2773	43.3141	132.342	7.94418	115.438
EW272			-13.7423	-20.8348	15.8333	24.5572	394.181	-26466	21.1667	549.08	18.0246	1.39296	1.51611	-26.3539	1.03588	0.706284	2.67211	3.68445	0.965254	0.765141	0.399361	26.3312	57.5431	73.3239	91.6549	27.476	31.2119	54.2409	0.942447	0.765876	2.77658	3.69695	1.06605	0.840919	0.434627	28.9458	58.0119	83.1155	103.894	24.8955	29.0662	50.1038	22.8949	43.6185	20.7235	47.5109	156.746	9.40849	132.211
EW273			-16.6357	-20.6377	15.8333	23.3813	316.54	-15424.9	35.1389	536.172	24.1667	1.69385	1.24057	-25.9802	1.02224	0.74798	3.04345	4.15877	1.14358	0.861008	0.38689	36.2512	76.7663	101.045	126.306	26.8185	40.5151	52.7772	1.20674	0.827765	2.95203	4.05904	0.957415	0.738007	0.385749	33.6466	72.4769	93.5777	116.972	27.2727	38.8303	53.5761	31.3008	69.961	38.6603	55.2597	269.627	16.16	143.385
EW274			-17.2634	-22.7563	13.75	22.9167	293.9	-19140.7	29.7917	571.328	21.1383	1.94395	1.31818	-25.1064	1.01345	0.718628	2.63497	3.58392	0.98581	0.718628	0.401028	25.4347	53.8504	67.865	84.8313	26.4781	28.4156	52.7677	0.893871	0.688868	2.84117	3.81824	1.07308	0.745324	0.375616	30.6311	62.6642	75.1743	93.9679	25.5894	32.0331	51.1186	21.4161	39.4447	18.0286	45.706	119.613	7.17539	150.725
EW275			-17.5693	-23.5692	16	23.4375	406.126	-25961.1	23.0556	598.786	18.0055	1.47438	1.3415	-25.4054	0.921238	0.730993	2.68307	3.64359	1.08357	0.888152	0.444381	26.5991	56.0264	82.0392	102.549	26.3621	29.4273	52.524	0.862303	0.694806	2.72959	3.70356	1.18489	0.862303	0.420436	27.7529	58.2604	79.8492	99.8116	26.2981	30.5074	52.364	16.6801	39.9868	23.3067	58.286	172.696	10.3715	134.957
EW276			-16.4452	-23.9971	16.6667	22.8092	359.888	-28432.6	17.7778	504.383	16.177	1.4015	1.45922	-21.0185	1.20825	0.905135	2.42702	3.46898	1.00828	0.694638	0.461165	20.732	49.7899	74.5378	93.1723	30.0364	29.0579	58.3611	1.05964	0.846196	2.74066	3.60454	0.873981	0.68706	0.425368	28.0315	54.5969	74.7962	93.4953	23.9664	26.5654	48.6574	21.7292	41.6586	19.9294	47.8398	153.977	9.24725	129.431
EW277			-16.9683	-24.8355	15	24.1667	400.346	-28042.6	19.5083	544.841	16.6226	1.36092	1.46364	-21.938	1.06837	0.712249	2.39494	3.52267	1.13366	0.807216	0.431339	20.0539	51.6649	71.1602	88.9503	32.0135	31.611	61.1847	1.02435	0.688629	2.51714	3.68038	1.19772	0.802801	0.405239	22.7042	57.391	74.5372	93.1715	31.6065	34.6868	60.4394	17.7201	43.5449	25.8248	59.3061	199.656	11.9827	129.346
[truncated: 16 more columns]
