# Supplementary material for: Segmental analysis by speckle-tracking echocardiography of the left ventricle response to isoproterenol in male and female mice
Source: PeerJ. 2021 Mar 12;9:e11085. doi: 10.7717/peerj.11085 (PMC7958899; doi:10.7717/peerj.11085)
Supplement: Supplemental Information 3 — Data for Figures 1, 3, 4 and S1. [file peerj-09-11085-s008.xlsx]

## Sheet: Figure 1
id
Fig. 1B		Post Base		Post Mid		Post Apex		Ant Base		Ant Mid		Ant Apex		Aver Curve
		Pre-Iso	Iso	Pre-Iso	Iso	Pre-Iso	Iso	Pre-Iso	Iso	Pre-Iso	Iso	Pre-Iso	Iso	Pre-Iso	Iso
EW248	ISO M	33.56	13.69	77.2	20.51	20.89	14.06			50.98	64.56	47.15	46.27	45.9556	30.94
EW249		35.3	28.66	50.24	26.53	18.99	12.28			39.49	49.58	32.11	27.09	35.2266	24.73
EW250		33.43	18.25			19.94	13.14	50.2	30.14	41.76	46.28	25.42	33.05	34.1496	29.63
EW251		40.2	0.65	88	48.75	38.4	23.7			39.31	40.66			43.0611	28.47
EW252		31.3	15.98	76.28	45.36	40.27	21.64	55.08	6.89	48.84	30.96	42.99	27.8	43.6989	22.05
EW253		22.67	14.91	86.8	32.15	32.89	14.28	18.2	35.35	44.01	32.61	29.87	57.59	39.0737	28.8
EW254		35.78	4.59	55.74	14.36	17.58	26.41	35.89	37.26			26.5	28.66	34.298	22.9
EW255		40.96	9	46.16	41.61	15.89	12.09	45.34	22.8	43.66	39.44	25.41	26.39	34.418	22.41
EW256		54.42	47.97	48.59	68.5	37.77	41.2	38.91	61.74	52.89	38	41.61	35.11	45.6989	47.13
EW257		30.94	22.81	51.36	29.71	44.41	27.62	34.54	25.62	50.28	32.58	38.84	29.22	41.7296	26.78
Fig. 1C
EW268	ISO F	33.58	3.23	42.22	7.57	27.17	24.84	32.41	25.59	42.18	47.18	30.95	31.23	35.2192	20.34
EW269		56.1	21.26	72.46	40.56	27.5	10.2	33.31	34.8	58.64	45.22	47.47	17.64	49.6004	25.22
EW270
EW272		47.79	30.89	61.53	21.41	15.19	26.04	46.72	32.09	64.71	56.83	47	48.7	47.1567	32.13
EW273		34.91	23.27	53.76	40.72	13.62	13.22	40.23	22.75	44.32	24.35	15.22	15.18	33.6767	21.15
EW274
EW275		43.53	31.12	63.95	41.98	11.58	32.33	33.14	15.13	59.94	36.21	36.18	28.42	41.3862	28.56
EW276		35	33.73	63.11	21.97	37.84	19.65	35.71	20.15	48.75	43.61	32.95	36.28	42.2253	28.22
EW277		14.56	16.5	38.67	22.81	18.75	12.58	20.28	24.03	37.42	31.82	28.99	18.11	27.6785	19.52
Fig. 1D
EW248	ISO M	-25.3	-7.49	-23.92	-11.22	-16.17	-22.91			-29.5677	-16.62	-11.15	-10.41	-21.2203	-10.8
EW249		-19.23	-21.4	-23.97	-9.26	-18.67	-9			-19.2941	-14.9	-16.9	-21.38	-19.6105	-9.71
EW250		-32.37	-16.36			-28.12	-21.25	-10.49	-19.43	-13.797	-10.56	-24.9	-13.11	-21.9344	-14.37
EW251		-12.22	-19.53	-27.58	-13.84	-27.78	-20.35			-18.6833	-20.1	-18.32	-9.76	-20.9152	-14.45
EW252		-43.56	-19.03			-26.77	-17.1	-16.69	-12.25	-30.4015	-8.34	-24.35	-14.89	-28.3524	-11.17
EW253		-43.06	-26.37	-20.26	-16.74	-17.34	-10.76	-17.29	-10.15	-9.6525	-14.14	-19.59	-17.44	-21.1965	-14.99
EW254		-31.85	-14.25	-24.59	-6.38	-22.76	-10.88	-16.47	-6.89			-22.54	-8.81	-23.6435	-8.59
EW255		-25.61	-12.92	-15.51	-15.19	-21.14	-15.52			-16.0204	-14.58	-20.3	-14	-19.7159	-11.09
EW256		-28.75	-8.09	-16.34	-23.69	-21.9	-24.15	-16.28	-24.82	-8.7625	-15.8	-25.3	-12.78	-19.5576	-16.68
EW257		-29.11	-12.65	-18.2	-4.66	-26.73	-14.16	-11.61	-3.54	-8.3205	-10.77	-22.17	-18.31	-19.3593	-9.72
Fig. 1E
EW268	ISO F	-25.97	-5.86	-16.22	-6.44	-27.41	-13.29			-34.3063	-18.17	-16.6	-8.58	-24.101	-7.68
EW269		-34.02	-8.05	-8.55	-17.74	-34.09	-16.51	-12.25	-0.62	-23.3779	-11.34			-22.4572	-9.81
EW270
EW272		-26.12	-21.64	-7.4	-12.23	-34.1	-13.86	-20.53	-12.3	-17.9955	-9.94	-24.08	-23.85	-21.7049	-14.4
EW273		-36.44	-5.6	-12.11	-15.05	-16.24	-20.77	-16.04	-3.83	-11.575	-16.23	-28.5	-13.26	-20.1492	-11.91
EW274
EW275		-16.45	-7.88	-18.26	-17.2	-29.15	-25.21	-14.98	-11.22	-7.2994	-8.48	-20.3	-22.34	-17.7393	-14.21
EW276		-32.81	-4.38	-18.19	-14.83	-35.23	-19.51	-13.63	-12.33	-25.9642	-18.09	-13.75	-6.6	-23.2624	-10.92
EW277		-33.65	-13.22	-14.33	-1.88	-21.57	-12.97			-18.0711	-9.96	-15.12	-19.6	-16.4625	-13.37
Fig. 1F-L	Grouped data from Figure 1 B-E

## Sheet: Figure 3
id
Fig. 3B		Post Base		Post Mid		Post Apex		Ant Base		Ant Mid		Ant Apex		Aver Curve
		Pre-Iso	Iso	Pre-Iso	Iso	Pre-Iso	Iso	Pre-Iso	Iso	Pre-Iso	Iso	Pre-Iso	Iso	Pre-Iso	Iso
EW248	ISO M
EW249		8.2669	7.1295	9.6197	9.0987	5.3548	10.6471	7.4748	10.7522	8.1228	12.8263	6.8495	6.6166	7.61475	9.51173
EW250		7.2014	7.2611	8.3275	9.0656	7.0662	5.7474	12.3461	7.081	9.819	9.8575	5.5588	7.1572	8.3865	7.69497
EW251		8.1765	4.534	15.0145	11.7092	11.6317	5.3737	4.6964	8.8787	9.0313	7.6871	4.0409	6.3648	8.76522	7.42458
EW252		6.2924	6.0529	14.2772	8.4427	10.2173	9.901	12.4034	3.2725	9.2446	7.8304	6.7799	8.9654	9.86913	7.41082
EW253		7.563	9.5234	14.985	10.3714	6.4765	10.2573	7.5978	11.0918	7.4623	11.2394	5.9067	12.8288	8.33188	10.8854
EW254		9.4822	4.7447	13.6101	7.5248	6.7351	9.8448	9.9644	9.2981	11.2099	10.8458	7.6848	6.8547	9.78108	8.18548
EW255		7.2547	3.0219	8.7624	7.8859	8.2689	9.7772	7.3667	8.327	6.8663	9.0329	6.4886	6.0973	7.50127	7.35703
EW256				12.09	12.0593	11.2246	9.2164			12.0356	10.1724	10.1267	7.5693	11.3921	9.75435
EW257		8.1691	5.8197	14.3831	7.041	17.476	9.1095	8.8596	8.4291	10.2414	9.0068	8.1835	11.0763	11.2188	8.41373
Fig. 3C
EW268	ISO F	8.9085	3.9723	9.9124	5.9838	7.7846	7.3047	7.1676	7.347	9.3405	10.0373	7.1259	7.756	7.2741	5.5596
EW269		11.7162	3.7612	13.0182	9.5238	9.2234	8.3956	8.4842	8.5395	10.2436	8.9319	10.3875	4.432	9.6882	5.963
EW270		10.419	6.5312			5.597	7.8779	4.027	11.5525	8.9314	12.0008	7.2758	6.6584	7.0324	9.5095
EW272		11.6501	8.3349	13.681	9.6084	8.4635	7.8022	9.9201	8.9132	11.1097	11.9219			8.2506	8.8974
EW273		8.1196	5.9309	13.9951	8.6665	4.9037	5.5215	12.0455	11.0906	9.5234	5.5697	5.2187	3.8389	7.7726	6.3054
EW274		7.3221	6.1703	7.3249	9.0937	6.9786	8.9233	9.4654	3.8739	9.2277	8.7636	6.5873	7.0887	6.1485	5.3707
EW275		9.8611	6.9644	13.437	9.1001	4.5207	10.4827	7.7181	4.5496	12.5075	6.0408	7.4012	7.1375	7.677	6.9308
EW276		9.731	7.2084	8.8443	6.8043	6.7482	6.847	10.1631	6.0003	8.1537	8.8433	6.1572	8.4104	8.0851	6.5191
EW277		4.2271	5.5564	9.8315	7.9279	6.6657	3.4679	3.93	5.492	7.7203	7.4599	7.5625	5.7546	6.2367	4.3772
Fig. 3D
EW248	ISO M
EW249		-6.4318	-7.494	-6.1426	-10.5613	-7.1057	-2.9373			-4.2713	-4.4616	-6.0298	-10.5707	-4.1621	-3.3707
EW250		-8.9863	-8.297	-4.6299	-5.3974	-7.9316	-5.6331			-4.4125	-5.8833	-6.6144	-5.9288	-5.5686	-3.4723
EW251		-5.3585	-8.6584			-8.1006	-4.8288	-6.7873	-4.6538	-8.785	-6.6911	-5.7834	-3.9113	-5.0184	-4.6046
EW252		-15.3801	-5.9221	-8.8187	-3.5219	-8.8784	-4.0944			-9.7281	-4.3888	-6.4889	-6.7069	-7.3488	-3.909
EW253		-15.8795	-10.7141			-5.9649	-5.8665	-6.5527	-4.5595	-7.0875	-5.0839	-5.3903	-8.9641	-6.2054	-5.4828
EW254		-17.0592	-6.6083	-13.5804	-4.8826	-9.6213	-4.1058	-10.4873	-2.6911	-8.0449	-6.9001	-7.1205	-4.5271	-5.8765	-3.153
EW255		-7.0854	-5.8278	-5.1293	-4.3381	-5.1551	-4.5537	-2.1556	-3.5607			-6.4173	-4.5663	-4.531	-3.7928
EW256		-13.5776	-6.0191	-5.4865	-7.4704	-7.6976	-6.7816			-5.6642	-5.5843	-12.7477	-5.0594	-5.2806	-6.2914
EW257		-12.7844	-4.4241	-6.3398	-3.7343	-15.7898	-6.5036	-6.5211	-2.9916	-3.6885	-4.15	-6.9927	-6.2934	-5.4096	-3.521
Fig. 3E
EW268	ISO F	-11.136	-4.866	-7.1321	-7.5377	-11.7236	-4.922	-3.0629	-5.7997			-9.9879	-2.5772	-6.3913	-3.2425
EW269		-17.7127	-3.1061	-9.2314	-6.0953	-12.465	-7.9995	-6.1821	-3.5416	-7.264	-4.5961	-4.3324	-6.3062	-5.3408	-3.0848
EW270				-4.0443	-9.2347	-11.0373	-8.6055	-5.7593	-9.067	-2.9756	-5.9022	-8.844	-5.5459	-3.4652	-6.7112
EW272		-8.863	-9.4489	-10.1925	-7.442	-8.995	-6.3647	-7.3806	-3.4449	-5.1975	-2.4757	-7.5906	-8.2194	-5.9847	-4.543
EW273		-12.1349	-2.4081	-8.2547	-6.2232	-5.2064	-7.3114	-11.6689	-2.4325	-7.1061	-4.528	-10.4117	-2.9205	-5.116	-3.9309
EW274
EW275		-5.9142	-2.6196	-5.1601	-7.9064	-8.5654	-6.4018	-6.6992	-4.2736	-3.6974	-2.1948	-7.154	-6.2331	-5.0677	-4.5412
EW276		-10.8738	-4.8895	-8.4335	-6.2432	-11.8647	-7.4164	-7.7659	-6.489	-9.7165	-7.4021	-5.8369	-2.7812	-5.8456	-3.1095
EW277		-7.7152	-12.0075	-5.7203	-2.7805	-5.8084	-5.6338	-8.3218	-3.5124	-4.4996	-2.6845	-6.6988	-5.7201	-4.3346	-4.1363
id
Fig. 5f		Post Base		Post Mid		Post Apex		Ant Base		Ant Mid		Ant Apex		Aver Curve
		Pre-Iso	Iso	Pre-Iso	Iso	Pre-Iso	Iso	Pre-Iso	Iso	Pre-Iso	Iso	Pre-Iso	Iso	Pre-Iso	Iso
EW248	ISO M	-10.5687	-8.2287	-12.0639	-10.6057	-5.9859	-10.4883	-8.1842	-6.6395	-11.0334	-13.9742	-9.356	-11.7234	-9.56722	-9.98728
EW249		-7.6984	-4.9743			-7.0082	-7.1506	-11.867	-7.5241	-9.929	-9.833	-9.356	-9.5395	-9.31446	-8.57434
EW250		-12.0951	-6.6857	-30.6575	-11.9786	-15.3248	-6.5642	-7.4393	-8.9534	-9.8357	-9.8604	-3.1677	-8.2155	-15.0705	-8.80846
EW251		-8.8258	-7.4767	-22.7804	-11.8827	-11.9148	-5.8432	-9.7157	-4.3451	-9.7091	-9.0737	-15.273	-9.8302	-12.5892	-7.72428
EW252		-10.2381	-7.1068	-23.9374	-8.3807	-13.3715	-11.4628	-10.159	-8.9736			-14.4357	-13.6135	-15.6065	-9.91856
EW253		-13.7352	-8.1695	-22.5672	-5.7833	-11.104	-8.32	-11.9242	-8.6907	-14.7932	-10.2115	-14.0335	-9.8254	-14.8248	-8.235
EW254		-9.6567	-2.6595			-7.757	-8.6817	-8.0316	-4.7628	-8.8131	-8.1764	-8.3787	-6.4786	-8.7149	-6.44126
EW255				-16.4	-15.0934	-10.1594	-11.5455	-12.5074	-14.9476	-16.3431	-9.0265	-14.297	-9.7817	-15.2377	-12.0724
EW256		-15.451	-6.6323	-23.8179	-9.7109			-18.735	-7.5518	-11.4349	-8.0391	-14.0977	-8.462	-18.506	-8.4257
EW257		-11.6845	-4.1906	-28.7593	-7.3033	-10.2415	-6.8092	-2.1881	-5.6196	-14.2968	-14.2198	-12.947	-11.3605	-13.434	-7.6285
Fig. 5g
EW268	ISO F	-8.9287	-5.7778	-18.7067	-6.2712	-10.5919	-6.9419	-9.3826	-6.1494	-10.5093	-10.3017	-12.7827	-12.6313	-11.6238	-7.0884
EW269		-9.9606	-5.959	-13.8818	-10.7033	-7.8086	-10.0336	-9.8659	-6.6879	-15.483	-9.0595	-14.9438	-5.4086	-11.4	-8.48866
EW270		-12.7196	-5.6393	-18.7909	-13.5894	-6.0188	-6.358	-5.6294	-14.1671	-20.3703	-10.9822	-17.0739	-11.1137	-12.7058	-10.1472
EW272		-16.7292	-10.2053	-26.5078	-9.1738	-13.6216	-12.4039	-14.4038	-9.3984	-22.554	-12.7676			-18.7633	-10.7898
EW273		-14.3811	-4.4464	-20.3738	-11.8587	-7.7287	-7.9879	-13.3325	-6.0234	-16.5764	-7.7039			-14.4785	-7.60406
EW274		-11.5364	-3.9069	-17.315	-11.0571	-13.2348	-7.4249	-9.2574	-3.506	-16.4548	-7.38	-14.0599	-9.1023	-13.5597	-6.65498
EW275		-8.2055	-9.6152	-13.9652	-11.1814	-6.2482	-8.5273	-8.0559	-4.8493	-19.6194	-13.8112	-14.9682	-13.1005	-11.2188	-9.59688
EW276		-13.9777	-9.2558	-22.1185	-7.1697	-14.6346	-11.4646	-10.2665	-5.6711	-13.0389	-12.6919	-11.5531	-13.703	-14.8072	-9.25062
EW277		-4.8025	-5.2239	-14.5542	-7.1451	-8.4227	-4.2517	-8.104	-7.207	-12.5342	-8.2168	-9.8287	-5.7212	-9.68352	-6.4089
Fig. 5h		Ant. Free Wall		Lateral Wall		Post Wall		Inferior free wall		Posterior septum		Anterior septum		Aver Curve
		Pre-Iso	Iso	Pre-Iso	Iso	Pre-Iso	Iso	Pre-Iso	Iso	Pre-Iso	Iso	Pre-Iso	Iso	Pre-Iso	Iso
EW248	ISO M	9.2618	8.9102	9.148	6.3601	9.8695	5.5424	8.2172	3.0949	6.7218	5.7291			8.64366	5.92734
EW249		10.9202	7.1401	6.829	5.8524	13.4209	5.2941	5.2564	7.3282	6.7778	5.2431	4.0332	5.2641	8.64086	6.17158
EW250				21.0215	6.0793	13.5198	5.4228	6.2426	3.4796	6.9366	3.8588	7.4433	4.7722	10.7857	5.27862
EW251		24.401	6.0304	7.8831	5.5184	17.1004	6.5267	7.7871	4.1661	11.6667	5.4601	14.4281	4.4034	13.7677	5.54034
EW252		19.0971	10.3549	13.0375	7.1193	6.4938	4.5436	7.8439	4.394	5.4001	5.8222	11.9747	7.323	10.3745	6.4468
EW253		26.7775	6.5723	18.6747	3.9621	16.3504	7.762	11.5786	2.6172	5.347	7.9731	14.1211	4.2718	15.7456	5.77734
EW254		9.0423	3.9288	5.297	4.9523	11.4211	4.8002	3.4922	5.0948	4.3429	4.3042	7.0924	3.7308	6.7191	4.61606
EW255		15.215	8.5578	6.9582	7.309	8.6802	13.0734	8.5841	9.0142	5.2952	5.0327	8.8653	10.8596	8.94654	8.59742
EW256		20.2683	6.3433	8.5906	2.5511	20.8918	4.2439	4.3238	4.5829	6.4915	3.1855	15.231	5.4638	12.1132	4.18134
EW257								5.0347	5.8774	10.8544	3.6083	12.121	9.1243	14.7459	4.69514
Fig. 5i
EW268	ISO F	11.0753	5.9769	11.2012	3.7024	17.3255	5.1115	5.5397	4.4167	12.7097	4.9119	11.6764	4.8191	13.5703	4.82388
EW269		13.9289	3.1169	8.2594	7.3514	12.1602	5.2568	5.0182	3.4219	7.4741	4.8955	6.61	5.0348	9.36816	4.8085
EW270		13.9416	12.8906	6.4596	8.9492	16.1233	10.7622	4.9957	6.6555	7.1802	5.2382	9.7564	13.6862	9.74008	8.89914
EW272		20.0879	8.8975	11.6727	7.9127	22.7474	8.0586	12.5646	3.509	11.9412	3.8082	12.0692	9.9489	15.8028	6.4372
EW273		25.8023	1.9928	6.722	5.4715			5.9759	2.5598	8.0848	5.7805	12.5036	4.7414	10.5937	4.80164
EW274				6.8584	9.807	19.6534	4.8772	4.4832	4.7283	5.9554	7.3791	15.5367	5.2841	8.36604	6.01928
EW275		8.5524	3.598	9.1427	4.9978	10.505	10.8011	9.5713	5.318	5.5013	3.1085	6.0706	10.2542	8.65454	5.56468
EW276		11.9799	4.7817	10.3653	8.4526	20.6115	5.2736	7.7189	6.5349	8.8594	5.4495	6.1247	7.6005	11.907	6.09846
EW277				7.2402	2.6712	10.1669	4.8397	5.1218	4.3511	8.832	3.9294	6.2183	5.7507	7.3631	6.24506

## Sheet: Figure 4
id
Fig. 4A		Post Base		Post Mid		Post Apex		Ant Base		Ant Mid		Ant Apex		Aver Curve
		Pre-Iso	Iso	Pre-Iso	Iso	Pre-Iso	Iso	Pre-Iso	Iso	Pre-Iso	Iso	Pre-Iso	Iso	Pre-Iso	Iso
EW248	ISO M
EW249		53.7879	58.9286	63.8298	52.2876	61.194	55.1724	42	56.0976	48.8	58.0952	46	55.6818	52.6019	56.0439
EW250		61.157	42.735	61.589	51.5528	63.889	55.7377	41.509	57.4074	52.778	48.7395	49.505	45.4545	55.0712	50.2712
EW251		61.947	46.5116	69.065	55.2326	68.627	48.7805	46.154	37.6623	63.366	49.2537	47.222	52.6786	59.3968	48.3532
EW252		66.038	43.1507	75.172	49.162	71.429	52.381	71.698	45	67.857	39.0977	58.025	34.2342	68.3698	43.8376
EW253		53.409	49.2308	69.565	44.5122	63.83	41.7722	45.455	31.746	55.856	42.963	51.351	41.7582	56.5777	41.9971
EW254		58.491	34.4828	72	34.3434	70.833	37.2549	57.407	34.5238	62.393	38.2022	63.366	37.2093	64.0817	36.0027
EW255		53.383	41.8919	66.871	49.4845	64.063	43.956	48.148	41.0714	52.8	46.2121	53.448	42.2018	56.4522	44.1363
EW256		67.669	57.4194	63.014	66.8675	63.415	63.8298	62.222	44.4444	55	52.2581	51.22	57.8947	60.4233	57.119
EW257		56.643	38.2022	62.57	41.5179	59.13	43.3333	50.769	40.7895	62.857	36.5385	50.495	40.7821	57.0773	40.1939
Fig. 4B
EW268	ISO F	56.701	25.8427	63.8889	26.5116	64.4444	45.3488	51.5152	61.5385	54.7619	43.6709	48.6842	25.641	56.6659	38.0923
EW269		59.5506	44.8598	64.9573	56.0976	65.6716	43.4783	67.2414	23.8095	59.1837	42.3077	49.3333	39.3939	60.9896	41.6578
EW270		57.1429	65.625	56.4103	66.2791	53.0612	63.8889	54.3478	51.8519	53.8462	62.3188	48.1928	60.7843	53.8335	61.7913
EW272		63.75	47.3282	82.5	49.3333	75	52.459	80	60	72.1519	58	68.9189	47.7273	73.7201	52.4746
EW273		62.963	44.8819	64.4444	50.6329	59.4595	44.8276	37.5	29.4118	51.1628	40.9938	55.2239	35.9649	55.1256	41.1188
EW274		51.938	36.4162	60.7595	46.3115	57.8313	41.8803	63.4146	38.5714	55.2632	40.7821	45.8333	36.9565	55.84	40.153
EW275		68.6275	43.2432	71.6981	58.1395	67.4419	60.6557	67.4419	45.9016	58.9474	50.7576	56.9444	33.3333	65.1835	48.6718
EW276		51.2821	41.4414	66.6667	46.7153	74.4681	57.8125	66.6667	50	62.1622	45.8015	51.7241	39.5833	62.1616	46.8924
EW277		46.5347	44.4444	58.7719	44.2177	53.1915	50.7692	39.4737	14.8936	44.3396	34.6457	42.8571	39.8058	47.5281	38.1294

## Sheet: Figure S1
id
Fig. S1A		Post Base		Post Mid		Post Apex		Ant Base		Ant Mid		Ant Apex		Aver Curve
		Pre-Iso	Iso	Pre-Iso	Iso	Pre-Iso	Iso	Pre-Iso	Iso	Pre-Iso	Iso	Pre-Iso	Iso	Pre-Iso	Iso
EW248	ISO M
EW249		0.6887	0.634	0.7284	0.4793	0.4178	0.2458	0.3806	0.4615	0.3431	0.4572	0.2678	0.2312	0.4595	0.3663
EW250		0.7023	0.3888	0.6853	0.4932	0.5147	0.2685	0.4421	0.466	0.3433	0.3389	0.2259	0.3239	0.4765	0.3626
EW251		0.7485	0.3882	0.8642	0.4922	0.5295	0.3882	0.2894	0.5311	0.4622	0.3173	0.1408	0.2392	0.4751	0.3847
EW252		0.695	0.5067	0.8698	0.5018	0.523	0.2731	0.4395	0.2839	0.5046	0.2221	0.4487	0.2469	0.542	0.3188
EW253		0.5549	0.409	0.761	0.4493	0.4901	0.4283	0.4125	0.309	0.3876	0.2386	0.3324	0.3419	0.4848	0.354
EW254		0.6415	0.3606	0.814	0.2891	0.4673	0.2245	0.5851	0.3697	0.4918	0.3333	0.3097	0.1497	0.5201	0.2527
EW255		0.6415	0.4366	0.6955	0.499	0.3658	0.2731	0.5157	0.3572	0.3715	0.3119	0.2822	0.2322	0.4621	0.3197
EW256		0.8881	0.6525			0.4152	0.6163	0.4884	0.6163	0.4587	0.3226	0.379	0.2316	0.5226	0.5204
EW257		0.589	0.4387	0.756	0.4489	0.5796	0.3205	0.4609	0.4759	0.5409	0.2891	0.407	0.2592	0.495	0.3531
Fig. S1B
EW268	ISO F	0.61	0.282	0.6643	0.1469	0.4042	0.2392	0.3638	0.3257	0.387	0.4189	0.2638	0.1853	0.4187	0.2415
EW269		0.547	0.4048	0.7216	0.5281	0.5442	0.3508	0.402	0.3107	0.5095	0.2821	0.3794	0.1702	0.5101	0.3219
EW270		0.5188	0.598	0.6047	0.6497	0.4206	0.4424	0.3937	0.463	0.4597	0.4067	0.3147	0.2616	0.4384	0.4528
EW272		0.5965	0.5287	0.776	0.3893	0.3836	0.4377	0.6649	0.377	0.58	0.4877	0.3912	0.3458	0.5434	0.3969
EW273		0.6036	0.4558	0.6253	0.5482	0.3914	0.3759	0.462	0.3259	0.3917	0.2369	0.1707	0.1548	0.4101	0.3455
EW274		0.5456	0.4069	0.7417	0.5732	0.4698	0.355	0.3253	0.4112	0.3733	0.3162	0.2903	0.2585	0.4362	0.3567
EW275		0.7173	0.4803	0.8754	0.5685	0.455	0.474	0.4768	0.2859	0.4583	0.3851	0.2434	0.227	0.5314	0.3861
EW276		0.5582	0.3935	0.6699	0.4033	0.3855	0.4272	0.416	0.391	0.4417	0.351	0.2425	0.1829	0.4367	0.3368
EW277		0.3999	0.5351	0.5574	0.3975	0.3565	0.3452	0.3184	0.3741	0.315	0.2478	0.2265	0.137	0.3537	0.3247
Fig. S1C		Ant. Free Wall		Lateral Wall		Post Wall		Inferior free wall		Posterior septum		Anterior septum		Aver Curve
		Pre-Iso	Iso	Pre-Iso	Iso	Pre-Iso	Iso	Pre-Iso	Iso	Pre-Iso	Iso	Pre-Iso	Iso	Pre-Iso	Iso
EW248	ISO M
EW249		0.4583	0.2828	0.2754	0.1104	0.093	0.3294	0.3679	0.4105	0.2212	0.2652	0.0364	0	0.1871	0.1495
EW250		0.5419	0.5272	0.2097	0.4261	0.2688	0.1122	0.4989	0.4632	0.2848	0.1774	0.0539	0.1043	0.2717	0.2679
EW251		0.4043	0.4052	0.2527	0.1304	0.2014	0.0791	0.603	0.4504	0.1792	0.1862	0.0807	0.0159	0.2618	0.172
EW252		0.4972	0.4371	0.1553	0.2593	0.2749	0.1746			0.3615	0.2207	0.1002	0.1597	0.3572	0.243
EW253		0.377	0.3772	0.1395	0.0421	0.0546	0.0544	0.27	0.3303	0.122	0.041	0.0515	0.0154	0.1088	0.0898
EW254		0.494	0.3426	0.3389	0.2031	0.1387	0.3821			0.2486	0.172	0.0471	0.0792	0.1958	0.1983
EW255		0.3875	0.4545	0.2197	0.257	0.2546	0.1708	0.3967	0.4497	0.3569	0.2002	0.0057	0.0094	0.2257	0.2075
EW256		0.4133	0.645	0.2662	0.3427	0.1991	0.1384	0.4556	0.5528	0.1607	0.1939	0.0475	0.0192	0.2225	0.2727
EW257		0.3071	0.3746	0.1099	0.1921	0.1531	0.2197	0.2698	0.3968	0.4034	0.3301	0.1093	0.1158	0.187	0.2557
Fig. S1D
EW268	ISO F	0.361	0.3587	0.278	0.3018	0.3433	0.392	0.5163	0.195	0.1903	0.1936	0.1048	0.0076	0.2568	0.2077
EW269		0.1571	0.3699	0.1927	0.1669	0.1608	0.0347	0.4053	0.2564	0.1397	0.2039	0.221	0.0282	0.1807	0.1423
EW270		0.2046	0.3662	0.1767	0.1318	0.0762	0.0593	0.3372	0.4894	0.1886	0.0744	0.1418	0.0387	0.1516	0.1682
EW272		0.2873	0.2315	0.2913	0.1683	0.2227	0.232	0.4797	0.1232	0.1723	0.1093	0.0407	0.0198	0.2385	0.0825
EW273		0.2041	0.4024	0.1633	0.2294	0.1714	0.1745	0.3724	0.382	0.346	0.2928	0.0436	0.0034	0.1979	0.2247
EW274		0.5599	0.4081	0.6243	0.2262	0.4116	0.1975	0.4693	0.298	0.3337	0.1387	0.0726	0.0138	0.3802	0.1707
EW275		0.1004	0.5474	0.3543	0.4062	0.128	0.2066	0.3612	0.3282	0.2296	0.2158	0.1883	0.0583	0.2042	0.2831
EW276		0.5161	0.3237	0.3784	0.3497	0.1863	0.2065	0.4797	0.2874	0.2587	0.0149	0.095	0.0301	0.2975	0.1362
EW277		0.3462	0.3871	0.2304	0.0401	0.1064	0.2782	0.36	0.1953	0.1983	0.0768	0.0203	0.0105	0.1585	0.1177
Fig. S1E		Post Base		Post Mid		Post Apex		Ant Base		Ant Mid		Ant Apex		Aver Curve
		Pre-Iso	Iso	Pre-Iso	Iso	Pre-Iso	Iso	Pre-Iso	Iso	Pre-Iso	Iso	Pre-Iso	Iso	Pre-Iso	Iso
EW248	ISO M
EW249		1.732	1.9699	1.9375	1.2141	1.3501	0.835	1.0217	1.2122	0.891	1.402	0.6224	0.5719	1.2138	1.1769
EW250		1.9133	1.113	1.819	1.3897	1.4819	0.8702	1.0825	1.0798	0.9444	0.9574	0.5403	0.8345	1.2568	0.9739
EW251		2.0994	1.2691	2.1461	1.3268	1.5404	0.9881	0.819	1.126	1.3025	0.7668	0.5294	0.5322	1.3465	0.9325
EW252		1.8915	1.6391	1.9144	1.3537	1.2246	1.0294	1.1259	0.9351	1.1879	0.679	0.8638	0.6237	1.3002	0.9036
EW253		1.7234	1.6898	2.0954	1.6307	1.4699	1.4983	1.1913	0.8948	0.9447	0.7853	0.7522	0.8677	1.2491	1.1566
EW254		2.3059	1.2148	2.3242	0.9993	1.6325	0.8849	1.6514	1.1228	1.5091	1.0889	1.2463	0.6348	1.6012	0.7654
EW255		1.6238	1.2675	1.6095	1.4351	1.2731	0.9973	0.9787	0.9291	0.8406	0.985	0.6996	0.6345	1.1355	0.9827
EW256		2.2429	2.0338	1.6381	1.8765	1.6715	1.5155	1.3107	1.9065	1.2841	0.8772	1.0406	0.5674	1.4036	1.3788
EW257		2.2393	1.1883	1.7539	1.4316	1.7953	1.1965	1.3023	1.2863	1.3693	0.9137	1.1667	0.8422	1.3688	1.0588
Fig. S1F
EW268	ISO F
EW269		1.7895	0.9337	1.5979	0.6217	1.3771	0.8753	0.8201	0.9173	1.0474	1.006	0.6604	0.5303	1.1926	0.7277
EW270		1.3384	1.1258	1.5642	1.6908	1.2212	1.1756	1.0307	0.8306	1.2519	0.7895	0.8171	0.4838	1.115	0.9569
EW272		1.8031	1.59	1.8105	1.1151	1.1029	1.6744	1.4865	1.0201	1.3983	1.391	0.8794	1.1567	1.3376	1.2892
EW273		1.6028	1.5773	1.5822	1.5363	1.3564	1.2884	1.1286	0.8881	1.1131	0.6406	0.6562	0.4181	1.2023	0.9791
EW274		1.7251	1.1445	1.8345	1.6725	1.3194	1.106	0.8653	1.2304	0.9907	0.8594	0.8937	0.663	1.1971	0.9592
EW275		1.8142	1.3267	2.1355	1.4888	1.3662	1.3401	1.0666	0.7174	1.0619	0.8443	0.6895	0.6763	1.2657	1.0038
EW276		1.6196	1.0818	1.4022	1.3919	1.0551	1.1981	0.8849	1.0454	0.9014	0.876	0.6384	0.4649	1.0648	0.9195
EW277		1.2869	1.646	1.6275	1.0841	1.1842	1.0278	0.701	0.9637	0.7253	0.6409	0.5343	0.4051	0.9872	0.9246
Fig. S1G		Ant. Free Wall		Lateral Wall		Post Wall		Inferior free wall		Posterior septum		Anterior septum		Aver Curve
		Pre-Iso	Iso	Pre-Iso	Iso	Pre-Iso	Iso	Pre-Iso	Iso	Pre-Iso	Iso	Pre-Iso	Iso	Pre-Iso	Iso
EW248	ISO M
EW249		1.2944	1.2317	1.1648	0.9703	0.7973	0.9981	0.9892	1.0866	1.0457	0.8572	0.5466	0.5261	0.4868	0.4423
EW250		1.4654	1.128	0.7403	0.9682	1.0207	0.3672	1.6422	1.4517	1.2207	0.6295	0.9129	0.6575	0.8918	0.6489
EW251		0.9228	1.0506	0.8966	0.7011	0.5323	0.6236	1.436	1.4222	0.7713	0.7924	0.4536	0.6215	0.6049	0.3986
EW252		1.3544	1.0594	0.8815	0.7121	1.3319	0.5503			0.9388	0.8333	0.4552	0.9774	1.0181	0.7659
EW253		1.3145	1.2583			1.0028	0.6717	1.0951	1.1247	1.0956	0.8995	0.4655	0.5417	0.4348	0.4771
EW254		1.1827	0.7421	1.234	1.0647	0.583	1.3625	0.9717	1.4272	0.9258	0.779	0.556	1.1798	0.4709	0.6927
EW255		0.7594	1.1235	0.7773	0.7605	0.8704	0.8578	0.8589	1.1253	1.1034	0.5793	0.6925	0.3779	0.5757	0.5698
EW256		1.2338	1.4957	0.9422	0.9491	0.6775	0.7754			0.8322	1.1176	0.5311	0.7975	0.6717	0.886
EW257		0.9296	1.1012	0.7208	0.9153	0.5748	0.5735	1.0856	1.2232	1.573	0.9746	0.4554	0.5221	0.6963	0.718
Fig. S1H
EW268	ISO F	1.0696	0.8651	0.773	0.7489	0.9558	0.9417	1.5533	0.7233	1.9557	0.4504	1.25	0.7446	0.6608	0.4019
EW269		1.1871	1.0609	0.9339	0.6972	0.5899	0.3685	1.4412	0.69	0.9761	0.5486	1.567	0.4571	0.8292	0.3833
EW270		1.32	1.4409	0.728	1.1997	0.5665	0.2644	1.0033	1.4177	0.9334	0.4964	0.9133	0.2795	0.5601	0.6583
EW272		0.6324	1.2132	0.6198	0.6086	0.4949	0.9523	1.3	0.5602	0.6669	0.521	0.2829	1.1585	0.5272	0.2915
EW273		0.6861	0.8342	1.0308	0.6306	0.9197	1.0807	1.4178	1.1075	1.0303	1.0059	0.3474	0.1461	0.5831	0.5931
EW274		1.6029	0.977	1.6268	0.6968	1.2349	0.8326	1.3637	0.9497	1.1371	0.5632	0.5592	0.6609	0.8299	0.5283
EW275		0.3055	1.1256	0.7633	0.8127	0.6076	0.6619	1.1141	0.8999	0.8449	0.7875	0.5028	0.1993	0.5915	0.5989
EW276		0.9829	0.9685	1.4379	0.991	0.4967	0.8299	1.1962	1.1012	0.6279	1.1997	0.4717	0.9483	0.524	0.3905
EW277		0.9075	0.9912	0.7559	0.3603	0.7792	0.6397	0.9792	0.7515	0.7642	0.4284	0.6084	0.8157	0.6185	0.3952
